# Supplementary material
Source: PubMed Central journal article supplement (PMC2977895)

# Supplemental Material

## **Title: Widespread Horizontal Gene Transfer from Double-stranded RNA Viruses to Eukaryotic Nuclear Genomes**

Huiquan Liu<sup>1,2</sup>, Yanping Fu<sup>2</sup>, Daohong Jiang<sup>1,2</sup> \* , Guoqing Li<sup>1,2</sup>, Jiatao Xie<sup>2</sup>, Jiasen Cheng<sup>2</sup>, Youliang Peng<sup>3</sup>, Said A. Ghabrial<sup>4</sup>, and Xianhong Yi<sup>2</sup>

1, State Key Laboratory of Agricultural Microbiology, Huazhong Agricultural University, Wuhan 430070, Hubei Province, P R China

2, The Provincial Key Lab of Plant Pathology of Hubei Province, College of Plant Science and Technology, Huazhong Agricultural University, Wuhan, 430070, Hubei Province, P R China

3, Department of Plant Pathology, China Agricultural University, Yuanming-Yuan West Road No. 2, Haidian District, 100193 Beijing, People's Republic of China

4, Department of Plant Pathology, University of Kentucky, 201F Plant Science Building, 1405 Veterans Drive, University of Kentucky, Lexington, KY 40546-0312, USA

18 **Table S1. Summary of candidates for non-retroviral integrated RNA viruses (NIRVs)**

19

| Database           | Organism                                                        | Accession no. and position (length, bp) | Best matched virus <sup>a</sup>     | Related gene | aa identity | E value <sup>a</sup> | Adjacent TE <sup>b</sup> | ORF disruption <sup>c</sup>      |
|--------------------|-----------------------------------------------------------------|-----------------------------------------|-------------------------------------|--------------|-------------|----------------------|--------------------------|----------------------------------|
| Eukaryota genomic  | Gastropods <i>Aplysia californica</i> (California sea hare)     | GL006980.1: 51763..52047(285)           | Cryptosporidium parvum virus 1      | CP           | 64%         | 3e-24                | DNA/Sola, NonLTR/Nimb    | internal stop codons             |
| GSS                | Plants <i>Brassica oleracea</i> (Wild mustard)                  | BH939664: 32..693(662)                  | Carrot cryptic virus                | CP           | 45%         | 6e-47                |                          | frameshift                       |
|                    | <i>Solanum tuberosum</i> (Potato)                               | EI814115: 1..138(138)                   | Raphanus sativus cryptic virus 1    | RasR6-3(CP)  | 52%         | 5e-05                |                          |                                  |
| GSS                | <i>Vigna unguiculata</i> (Cowpea)                               | EI930635: 3..218(216)                   | Fragaria chiloensis cryptic virus   | RNA3(CP)     | 41%         | 1e-05                |                          |                                  |
| HTGS               | <i>Lotus japonicus</i> (Lotus)                                  | AP010106.1: 56301..56798(498)           | Rose cryptic virus 1                | RNA3 (CP)    | 47%         | 4e-17                | NonLTR/L1                | internal stop codon              |
| Eukaryota genomic  | Fungi <i>Vanderwaltozyma polyspora</i> DSM 70294(Budding yeast) | AAZN01000409.1: 77491..77733(243) †     | Penicillium stoloniferum virus F    | CP           | 35%         | 2e-05                |                          |                                  |
| Eukaryotic genomic | <i>Penicillium marneffei</i> ATCC 18224 (Penicillium)           | ABAR01000142.1: 119..2156(2038)*        | Saccharomyces cerevisiae virus L-A  | CP           | 39%         | 1e-109               |                          |                                  |
| Eukaryotic genomic |                                                                 | ABAR01000272.1:1..1099(1099)            | Saccharomyces cerevisiae virus L-A  | RdRp         | 52%         | 1e-71                |                          |                                  |
| Eukaryotic genomic | <i>Candida parapsilosis</i> CDC317 (Budding yeast)              | CABE01000013.1: 736306..738291(1986)*   | Saccharomyces cerevisiae virus L-A  | CP           | 35%         | 1e-99                |                          |                                  |
| Refseq_ genomic    | <i>Schizosaccharomyces pombe</i> (Fission yeast)                | NC_003421.2 37110..38374(1265)          | Saccharomyces cerevisiae virus L-BC | CP           | 23%         | 3e-18                | DNA/Polinto              | internal stop codons, frameshift |
| GSS                | Nematode <i>Strongyloides ratti</i>                             | CZ541007                                | Magnaporthe oryzae virus 2          | RdRp         | 35%         | 7e-05                |                          | internal stop codons             |
|                    |                                                                 | CZ541027                                | Leishmania RNA virus 1 - 1          | RdRp         | 32%         | 5e-16                |                          | internal stop codons             |

|     |          |                               |                    |                                    |      |     |       |
|-----|----------|-------------------------------|--------------------|------------------------------------|------|-----|-------|
| GSS | Protozoa | <i>Entamoeba terrapinae</i> M | AM686088; AM680125 | Saccharomyces cerevisiae virus L-A | RdRp | 61% | 3e-61 |
| GSS |          |                               | AM668999           | Saccharomyces cerevisiae virus L-A | RdRp | 68% | 4e-27 |
| GSS |          |                               | AM686087; AM667464 | Saccharomyces cerevisiae virus L-A | CP   | 42% | 4e-47 |
| GSS |          |                               | AM677306; AM678833 | Saccharomyces cerevisiae virus L-A | CP   | 50% | 2e-53 |
| GSS |          |                               | AM670785           | Saccharomyces cerevisiae virus L-A | CP   | 47% | 2e-32 |
| GSS |          |                               | AM675473           | Saccharomyces cerevisiae virus L-A | RdRp | 38% | 2e-36 |
| GSS |          |                               | AM677307; AM676129 | Saccharomyces cerevisiae virus L-A | CP   | 33% | 4e-25 |

20 <sup>a</sup> Best matched virus and E value were generated by using totivirus-related sequences as BLASTx queries against the non-redundant (NR) protein  
21 database.

22 <sup>b</sup> The class/subclass of transposable element (TE) or repeat is indicated: DNA, DNA transposon; LTR, LTR retrotransposon; Non-LTR, non-LTR  
23 retrotransposon. See genome map of TEs in Figure S5 in the supplemental material.

24 <sup>c</sup> The types of ORF disruption (frameshift, stop codon, etc) are listed.

25 † This totivirus-related sequence has been reported by Frank and Wolfe (17).

26 \* The indicated two totivirus-related sequences have been reported by Taylor and Brueen (60).

27 CP, capsid protein; RdRp, RNA-dependent RNA polymerase; aa, amino acid.

28 **Table S2. List of genomic survey sequences which were assembled to generate the consensus**  
 29 **sequences (contigs).**

| Organism                   | Consensus sequence | No | Accession no. of genomic survey sequences (GSSs) |          |          |          |          |
|----------------------------|--------------------|----|--------------------------------------------------|----------|----------|----------|----------|
| <i>Nicotiana tabacum</i>   | Contig-1           | 17 | ET873515                                         | ET934781 | ET934863 | ET967037 |          |
|                            |                    |    | ET967098                                         | FH297731 | FH297797 | FH339569 |          |
|                            |                    |    | FH339650                                         | FH390292 | FH390372 | FH504911 |          |
|                            |                    |    | FH504985                                         | FH635597 | FH639246 | FH642791 |          |
|                            |                    |    | FH642879                                         |          |          |          |          |
|                            | Contig-2           | 7  | ET940016                                         | FH002080 | FH157022 | FH894314 | FH001811 |
|                            |                    |    | FH157103                                         |          |          |          |          |
|                            | Contig-3           | 12 | FH208174                                         | FI048635 | FI002313 | FH232372 | FH208234 |
|                            |                    |    | FH687998                                         |          |          |          |          |
|                            |                    |    | FI009877                                         | ET709315 | FH396656 | FH339993 | FH543953 |
|                            | Contig-4           | 9  | FH687920                                         |          |          |          |          |
|                            |                    |    | FH984307                                         | FH939624 | ET766028 | FH124202 | FH610390 |
| FH215682                   |                    |    |                                                  |          |          |          |          |
| <i>Zea mays</i>            | Contig-1           | 5  | FH939683                                         | FH463206 | FH610469 |          |          |
|                            |                    |    | CL993907                                         | CC669533 | CG156006 | CG437968 | CG080070 |
| <i>Medicago truncatula</i> | Contig-1           | 4  | CR296971                                         | CR499030 | CG966070 | CG969600 |          |
| <i>Strongyloides ratti</i> | Contig-1           | 4  | CZ547029                                         | CZ547019 | CZ540847 | CZ539206 |          |

30

31 Genomic survey sequences (GSSs) sharing an alignment of at least 97% identity and 50 bp overlap  
 32 are assembled to generate the consensus sequences (contigs) by running the CAP3 Sequence  
 33 Assembly Program (Huang and Madan. Genome Res.1999, 9:868-877).

34

35

36

37

38

39

40

41

42 **Figure S1. Multiple alignment of *ILR2* of *Arabidopsis thaliana*, *gem* of *Festuca pratensis* and**  
43 **capsid protein gene of SsPV-S.** The DNA alignment was derived from aligned amino acid  
44 sequences. The region of predicted *ILR2* intron is marked with a red rectangular box. *F.p\_gem*, the  
45 *gem* of *Festuca pratensis*; *SsPV-S\_CP*, capsid protein gene of *Sclerotinia sclerotiorum* partitivirus  
46 S.

47 **Figure S2. Schematic representation of regions with similar sequences for the junctions**  
48 **between some non-retroviral integrated RNA viruses (NIRVs) and host sequences.** Colored  
49 rectangular boxes with arrowheads indicate open reading frames (ORFs). Green rectangular boxes  
50 indicate repeated sequences in eukaryotic genomes detected by BLASTn searches. Blue arrows  
51 indicate primers which were used to amplify the junctions between NIRVs and host sequences. Red  
52 arrows indicate primers which were used to detect the transcripts of viral related homologs by  
53 RT-PCR. Gray sectors connect corresponding homologous regions and the % nt identity is indicated.  
54 Red bars represent the matched regions of sequences that are identified by BLASTn; the sequence  
55 types and % nt identity are indicated: GSS, genomic survey sequences; EST, expressed sequence  
56 tags, WGSs, whole-genome shotgun sequences.

57 **Figure S3. Multiple alignments of the amino acid sequences of some non-retroviral integrated**  
58 **RNA viruses and their related viruses.** The regions of RdRp conserved motifs of partitiviruses (A)  
59 or totiviruses (B) are marked with red solid-line boxes. FsV-1, *Fusarium solani virus 1*  
60 (NP\_624350); RNPV1-W8, *Rosellinia necatrix partitivirus 1-W8* (YP\_392480); VfpV-1, *Vicia*  
61 *faba partitivirus 1* (ABJ99996); Dh, *Debaryomyces hansenii* CBS767; Ps, *Pichia stipitis* CBS 6054;  
62 Et, *Entamoeba terrapinae* M; Cp, *Candida parapsilosis* CDC317; Pm, *Penicillium marneffei* ATCC  
63 18224; ScV-L-A, *Saccharomyces cerevisiae virus L-A* (NP\_620495).

64 **Figure S4. Binary rooted trees of some non-retroviral integrated RNA viruses (NIRVs) (A, C)**  
65 **and their related viruses (B, D) with Ka/Ks ratios plotted on branches.** These trees were  
66 obtained by a neighbor-joining analysis of a codon sequence alignment under the Maximum  
67 Composite Likelihood substitution model. Branch lengths are not to scale. (A) and (B), rooted tree

68 of capsid protein-like sequences of NIRVs and partitiviruses respectively. (C) and (D), rooted tree  
69 of RNA-dependent RNA polymerase-like sequences NIRVs and partitiviruses respectively. A ratio  
70 of less than 1 indicates purifying selection to conserve protein sequence. Note that the Ka/Ks ratios  
71 are averaged over sites.

72 **Figure S5. Schematic representation of endogenous non-retroviral dsRNA-like elements and**  
73 **flanking transposable elements in eukaryotic genomes.** Yellow rectangular boxes indicate  
74 non-retroviral integrated RNA viruses: arrowheads within boxes indicate sequences retaining the  
75 reading frames of viral genes;  $\psi$  within boxes indicate sequences containing frameshifts and stop  
76 codons compared with viral genes. Green rectangular boxes indicate repetitive or transposable  
77 elements annotated by BLAST. Blue rectangular boxes indicate repeats annotated and classified by  
78 Censor. The Censor server automatically classifies all known repeats and adds the classification to  
79 the report. The class/subclass of repeat is indicated: DNA, DNA transposon; LTR, LTR  
80 retrotransposon; Non-LTR, non-LTR retrotransposon. CP, capsid protein; RdRp, RNA-dependent  
81 RNA polymerase. \* Two genomic contigs of *Ixodes scapularis*, which are homologous to each  
82 other, one contig (ABJB010791923) contains the viral homologous sequence whereas the other  
83 (ABJB010911717) does not. Gray sectors connect corresponding homologous regions.

84  
85

Figure S1

ILR2 1 ATCGCCTCTGAATCTTCAACTCACAAGCGAGCTT-----GAGAA 42  
F.p\_gem 1 ATCTCGTGAAGA CAATGCCTCCATTGAGAGCCGCCTCGCTGCAGCCAAAGCTGCCGTCCGCGAA--CTTGGCTTGAAGACCAATTC-----CTGAG 93  
SsPV-S\_CP 1 ATGTCTTCCGCTCCGCTCGCAAGGTCTCCA CT CAGGAGAAAACCTCCTCT---CAGTCTGGAAAGAACCTGCCTCCAAGAA GTCTGGAAAGAAATCTGCCCCCCCGAGTATTCTGT CGATACTCCATCCGAA 132

ILR2 43 AAGACTTGTCTTAGTITC-----CTT----- 63  
F.p\_gem 94 CAAACAGGACTGACCTCG-----CTCGACGAGCTTGACCCCAAGCAGTT CGACGATTGGCC---CCCTATGCTCCAAAGAGCTGAAGCCGTCCACCTCGGAGCCCAACCCCTCGAAA GAGCTCACACGC 219  
SsPV-S\_CP 133 CAATCGGATGTTGAATCCGACATCCTCTCCGAAGCTCGAAGTCTCTGACGCCGATGACGCCTCCCGTCCCCTGCCCGCTTCAAAGTGAAGAAAGGTACAACACGCAACAAGAA GAAGGAAAAATCTGTGCCTCC 267

ILR2 64 -----TCTAGTTT CACCCGAAAGCAAAATCGTGTACCCAACGCAAGGTATCTCACACTACTACCTTCTCTGCCAC 132  
F.p\_gem 220 TCTGACGTGACACCTCCGATGACTACACCCCTGAGTCCGCCTCTGACATG---CTCATGCCTTATTTAGGCCTGAACCTTAGGTATGCTCC-----CGCCAGCCCAATCGCGCTACGCCCTCTAGCCAT 345  
SsPV-S\_CP 268 TCCGCTGGATCATCA-----ATCCACCCTACATGATGATGCTCACCGCCCTCAACTTTTCTCTCAGCAAAATCGAA-----CATGTACCATCTCAACTATACTCCAAAGCTGTTGG 378

ILR2 133 ATGATG-----GTCCATGCTATGACATTACACTTTGCGATAATTTT GATTTCAAACGGGC AATCCCAACTATCACCCCTACATCCTCCGCCTCTACTGTGCTGTTCTCTTTTGGATCCAAGTGTCTTAGA 258  
F.p\_gem 346 ATGATGGACTACATCGTCCACCTCATCAACGACAATTTATCGGACAATTTCTATTTCAAGA GAAGCTGTCGCGACTACACCCCTACATCCTCCGCCTCTACTATGCGTATTTATTTGGATCCAAGTGCCTCCG 480  
SsPV-S\_CP 379 TC GATGTACGCCGCTCTCGACGCTATGCATGATCTCGTTGGTGATAACGCTTCTCTTCGTGCTTTCTGTCCCTACTATCACGTGCCCCTGTCCAATAATTTACTATGATATTACTTCATCATCAAGTCTCCG 513

ILR2 259 GCTGAAACGATGTGAATGATCTTACTGATGTTCAACACCGGTTCTTAAACCGGTTCTTGGACAACCATCCTTGGAAACTCTCGTGTTC CCGGCCCTCTCCTCGGACTCTTCAAGACTCTTTGCTCTTCGCAG 393  
F.p\_gem 481 GCTGCCCGT CACGTCGGTGTCTT GAGGACCAAGAATATCAGTTT T GATGCGTTTCTAGATGCTTACCCTCTAGAGTGGTTACCATGTCCA GCCCTTGTGTTTATATTCAAA ACTTTGTGCTCTCCAG 615  
SsPV-S\_CP 514 GCCAATCAAGTCCCAACAATCTCTCTCAACCTGATTTT CAGTTTCTGCTTTT T T GATGCAATTTTGTCTCGAAGAACTCCTGTGCGCGTCCCCTCGTTCCTTTTCCAGACCTCGCCGCTTCAA 648

ILR2 394 CCGGAGTTTCTCATAATCATAATGGGAAA GTGATCCTCGCATCCCTGCCAACGAGCCCGGGCTCGAGCTCACGCGTTCATGGACATCTTCTT GAAAGCCACTTCTTGGCTAACGTCCTGGCATCTTCGCC 528  
F.p\_gem 616 CCAAGATTTCCACC-----TACGGTAAAGTTTACCCGCCCTCCCTTCACTCCCCGCCCAACCGCCCGCAGAGTTCATGCATGAACACGTGCAAAATTTCTTTGTTCCCAATCCC CGGGATCATCGCC 744  
SsPV-S\_CP 649 CCTGATGGAAATCGT-----TTTAACTGGTTGTTCTCTCACTAACAAC---TACGGTCCCGCAACGCTCTAATTCACCCCGTGTGAACGCACAACTACCGCACTTCCCAACTACTCAGATGATCTCA 774

ILR2 529 CTCTTGAAGACTTAAACCGCTTTTACC CAATA CCTCCGCTATCCTCAAAGAAGGCAG---GC CATTCCGTTACCCAAATACCTGCT-----TCTAACTTCGGTCAAAAGACCTTTGGTCT 645  
F.p\_gem 745 CTCTCGCCACC TAAACAGTATCATCAACA CCGCCGACCTCGCAACGCTGTGTTTCCCGCAAAGGAAACACATCCTGTGACCGCAACGCCGCCAGGCCACTGTTTTTGGCCACTTCTTTCCCAT 878  
SsPV-S\_CP 775 CTCTTAATCTCTTTGGTGCT-----TCCAACGCTGCCCTCTTACAGCTATGAT---ACCGCAGGACAAATGGAAACA-TTCACTTTC---GCCGCTGGTGAACCATCGCTGGTTTGCCTTATGGTGCTGG 896

ILR2 646 CCATGCAAGCAGGACAGAGGCTGAAAATGGTCACTCGTTTTACCTGGCTTACAGTACCCTTGTGAAGCCGATCAAAGCCTGATGAGGCGTTCCTGATTGCTACAGCAATTTAACTTTCAGGTCACTTCTGC 780  
F.p\_gem 879 CGCTGCAGAACGCAACAATTTTAAAAGTGGAAGCCTGTCTCCTCTGGCTCCA GTACCCTGCGAA GCCGATCAACGGCTTAAAGAACTTTTCTGAGGATATGAATCGTTCAACTTCCCTGCCAATTGCC 1013  
SsPV-S\_CP 897 ATTTGCTACTGATGCTGCTGCATCGA CCAAACCTTCGCGCCCAAGCAATTACGTTCTTGGCAACATGACACCGCCATCCATAGGAAACTCTTCTATCAGTGAAGAAATGAGCGTCCAACAATGAACCG 1031

ILR2 781 CGCTGATAA CCTCGAAAAGATCTCTTCTTTCTCCACATGAACACAGCATGGCTTGGTTCAATCAAGTAAAAGGAGTTGCGGATGATGTTGCTGCATCCTTTGAAAGATCCGGCACCTT GCTGACTGCTCTCC 915  
F.p\_gem 1014 AAAGGATGATTTACGATTTCTTTCAAGCTTTT GAGTATGAACGGTGACCTTTCTGGTTCGCCAGTCCGCGCTGCCAAGCCGACCGTTTAAACGCTCTGGCACATTAGCTGACTGTCCCC 1148  
SsPV-S\_CP 1032 TGCTAAGATTCC-----CCACGCACTTACTGTGGCTAGACGGTCAATTTCACTGGTTTACAAAGCCATTGGAGCTGTCAAGGCTAAGTATTTCTGGTGGATCTACTACACTCGCTAATATCAATCC 1160

ILR2 916 ACATGGGTTGGTGTAAACCAAGTATGGTCTGTTCTCTACC CGGAACATCTTCCAGAATCACCA AATTGATTTGCTGATAAGCGTGCAACCTATGAGTTCGGTTACCAGCTCAAA-----AGCACAGTTCC 1044  
F.p\_gem 1149 AACCGGGATAGTCTCAAACAGATTTGCGTTGAGTACATCGCCCCCGTACCGACGTAACCGCCCACACACAACGCCGACCCCTCTCGCTGTCCCATTCACCATCAAGCTCCAT-----TCCACAGCCA 1277  
SsPV-S\_CP 1161 TTC AACCCGCTCTTCCGCGTCTGTTGAAACTACTGTGCTGTGCCGCGCTGCTATTCTCAAGCAACCGCC-----TGGTATGAAGGTATCCCTCAACTCTTAACTAACTGTTAACACTCGGCTCCG 1286

ILR2 1045 CAACCTCCCTCCCCTTGGCAAGCATTGCCGCTTCTCTCAGACATATACAGGATGTTTCTTAAACATCCCTTCTTCCGGACGTTTGGCTGAAAACTCTTGATCATGGCCGTTCTGG-----AAATAAG 1173  
F.p\_gem 1278 GAACCTTCTCGCTATCACAAGTATGACCTGCACCGCCAGACCCACATCCGATGTTTCCGACCCACCGTATTTCCGGCAGTTTGAAGATCATCGTGGCTGC---GGCCATTCTGG-----GAAATCCG 1403  
SsPV-S\_CP 1287 TTCATCTCTGAAACAGATCTAAAGATTTGGTACCTTCCCTGCTACTTGT---AATATTATTACAGGTGAAACTTCAACCGCTGCAACGCTTCGTCCGTTTCTCGT---GGCGATTCTTCTGTGCTGCACCGAA 1415

ILR2 1174 GCCTATTGGCTCCAGCCTTACCGAT-----AACAGCTCTACCTCACTATCCATCGATTTGTCAAGCAAGCATTCAAAGGCCCAAGCCAG-----TAG 1261  
F.p\_gem 1404 CCGCATCGAGTCGTCCCCAAGGAC-----GAGTCTTCTACCTCTCTCTACAAAGGAGTCGTGCGAAGCTGCTCAAGCCCAA-----TAG 1485  
SsPV-S\_CP 1416 TCTATTAACTTCGAAAATCAAACCGAAGTTAACGCAATCGCTATGGCTCAACCAACCA TGACGCTTAGCTCTACCGCCCTAAAGGTGGAGAAGCTAACTCTGATGATTAG 1527

# Figure S2

## *Arabidopsis thaliana* ecotype Col-0 chr 3 NC\_003074.8

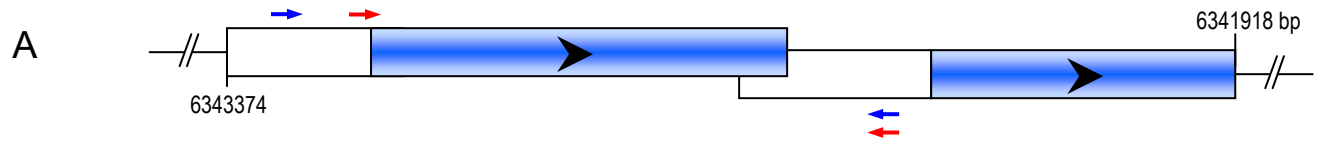

## *Arabidopsis thaliana* ecotype Col-0 chr 4 NC\_003075.7

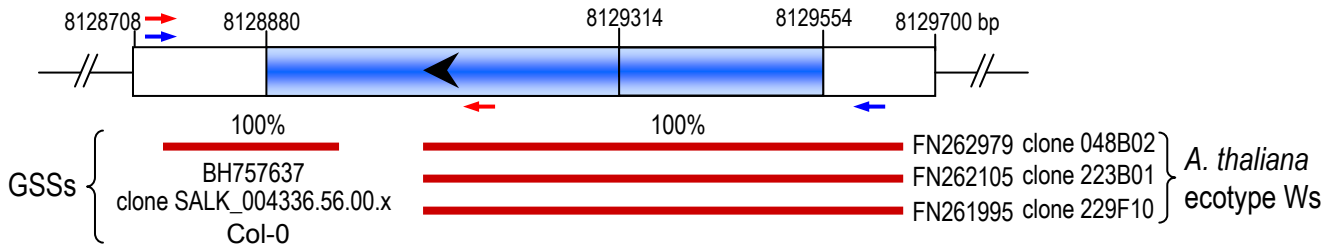

## *Acyrtosiphon pisum* strain LSR1 NW\_001917032.1

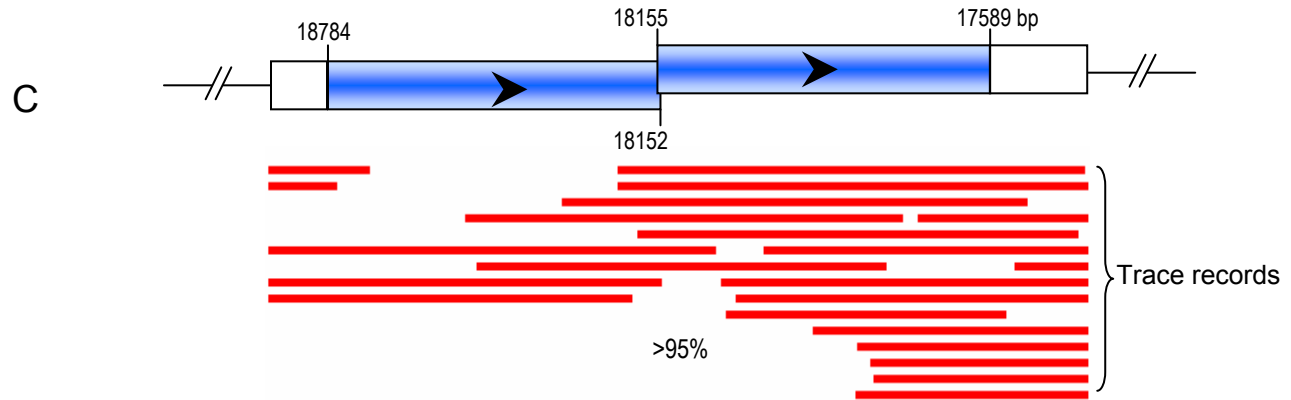

## *Brassica rapa* subsp. *pekinensis* clone KBrB070J05 AC189442.2

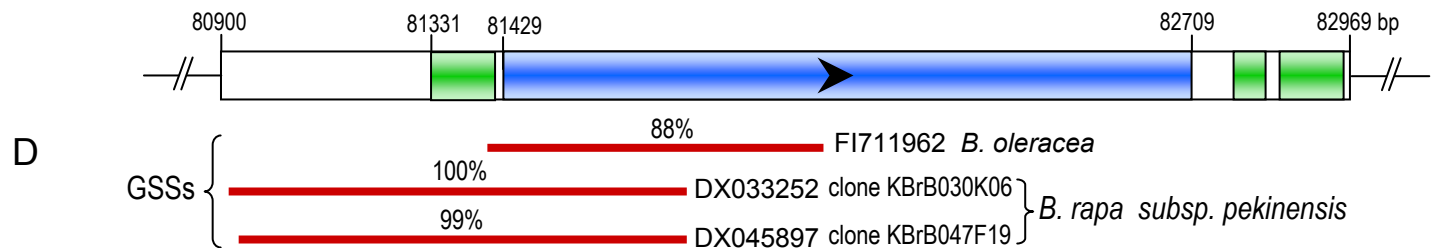

## *Populus trichocarpa* NC\_008473.1

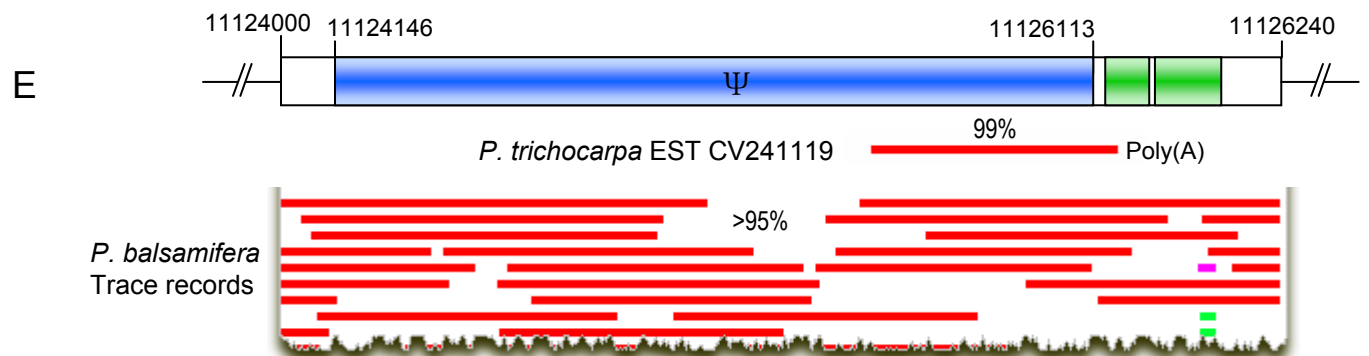



*Debaryomyces hansenii* CBS767 chr B NC\_006044.1

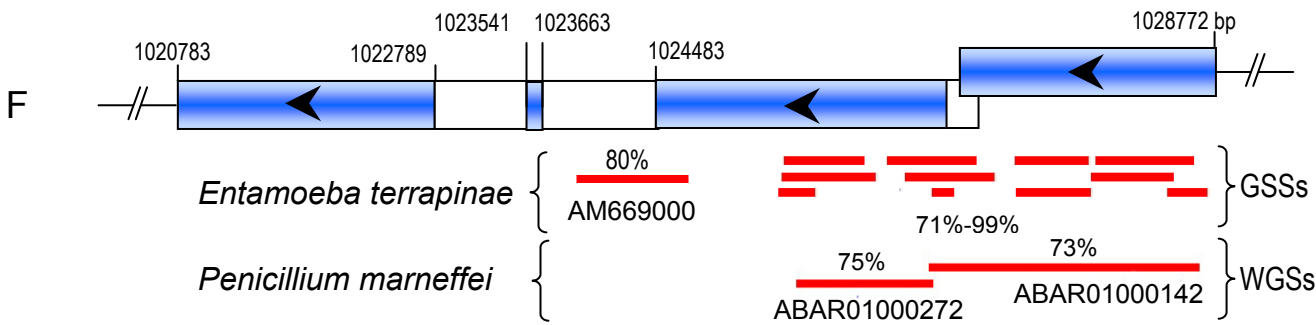

*Pichia stipitis* CBS 6054 chr 7 NC\_009047.1

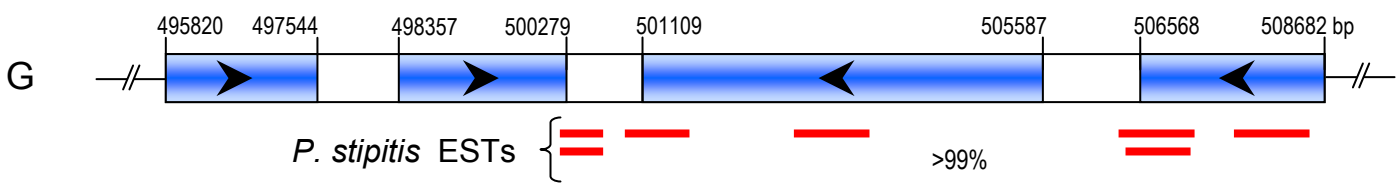

*Nicotiana tabacum* Contig-1

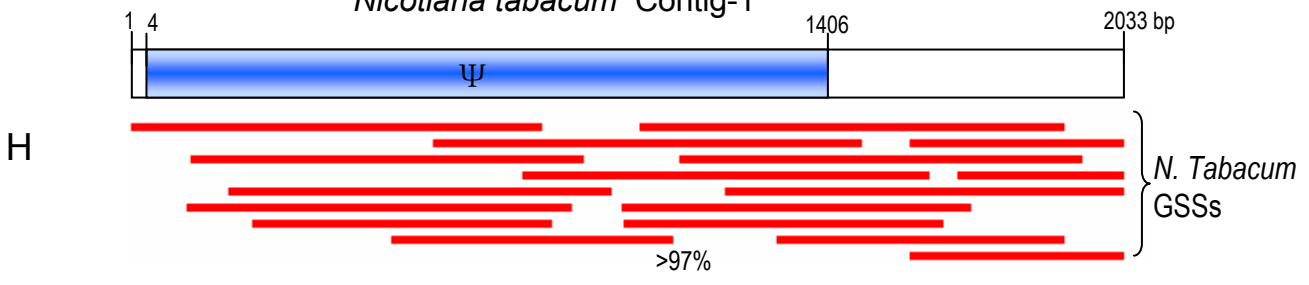

*Strongyloides ratti* Contig-1

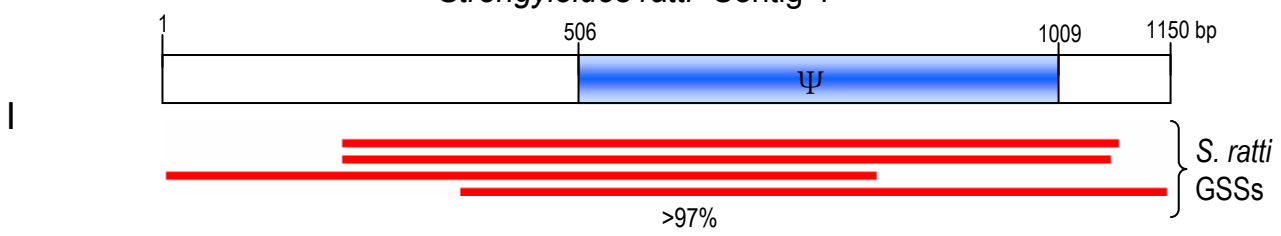

*Medicago truncatula* chr7 AC175047.3

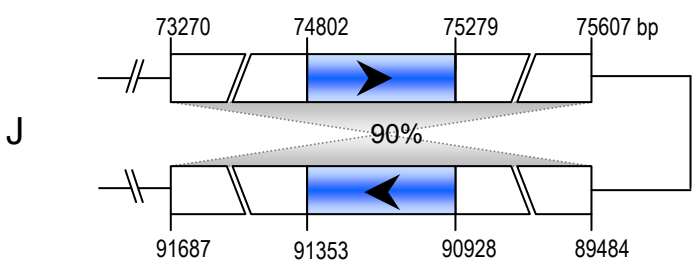

*Lotus japonicus* chr1 AP007812.2

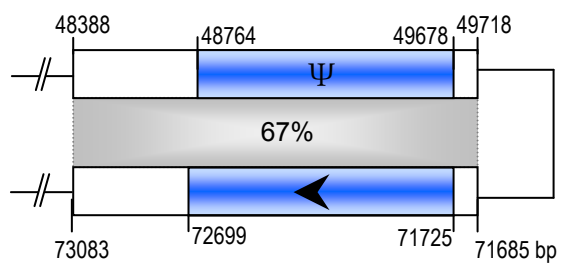

# Figure S3

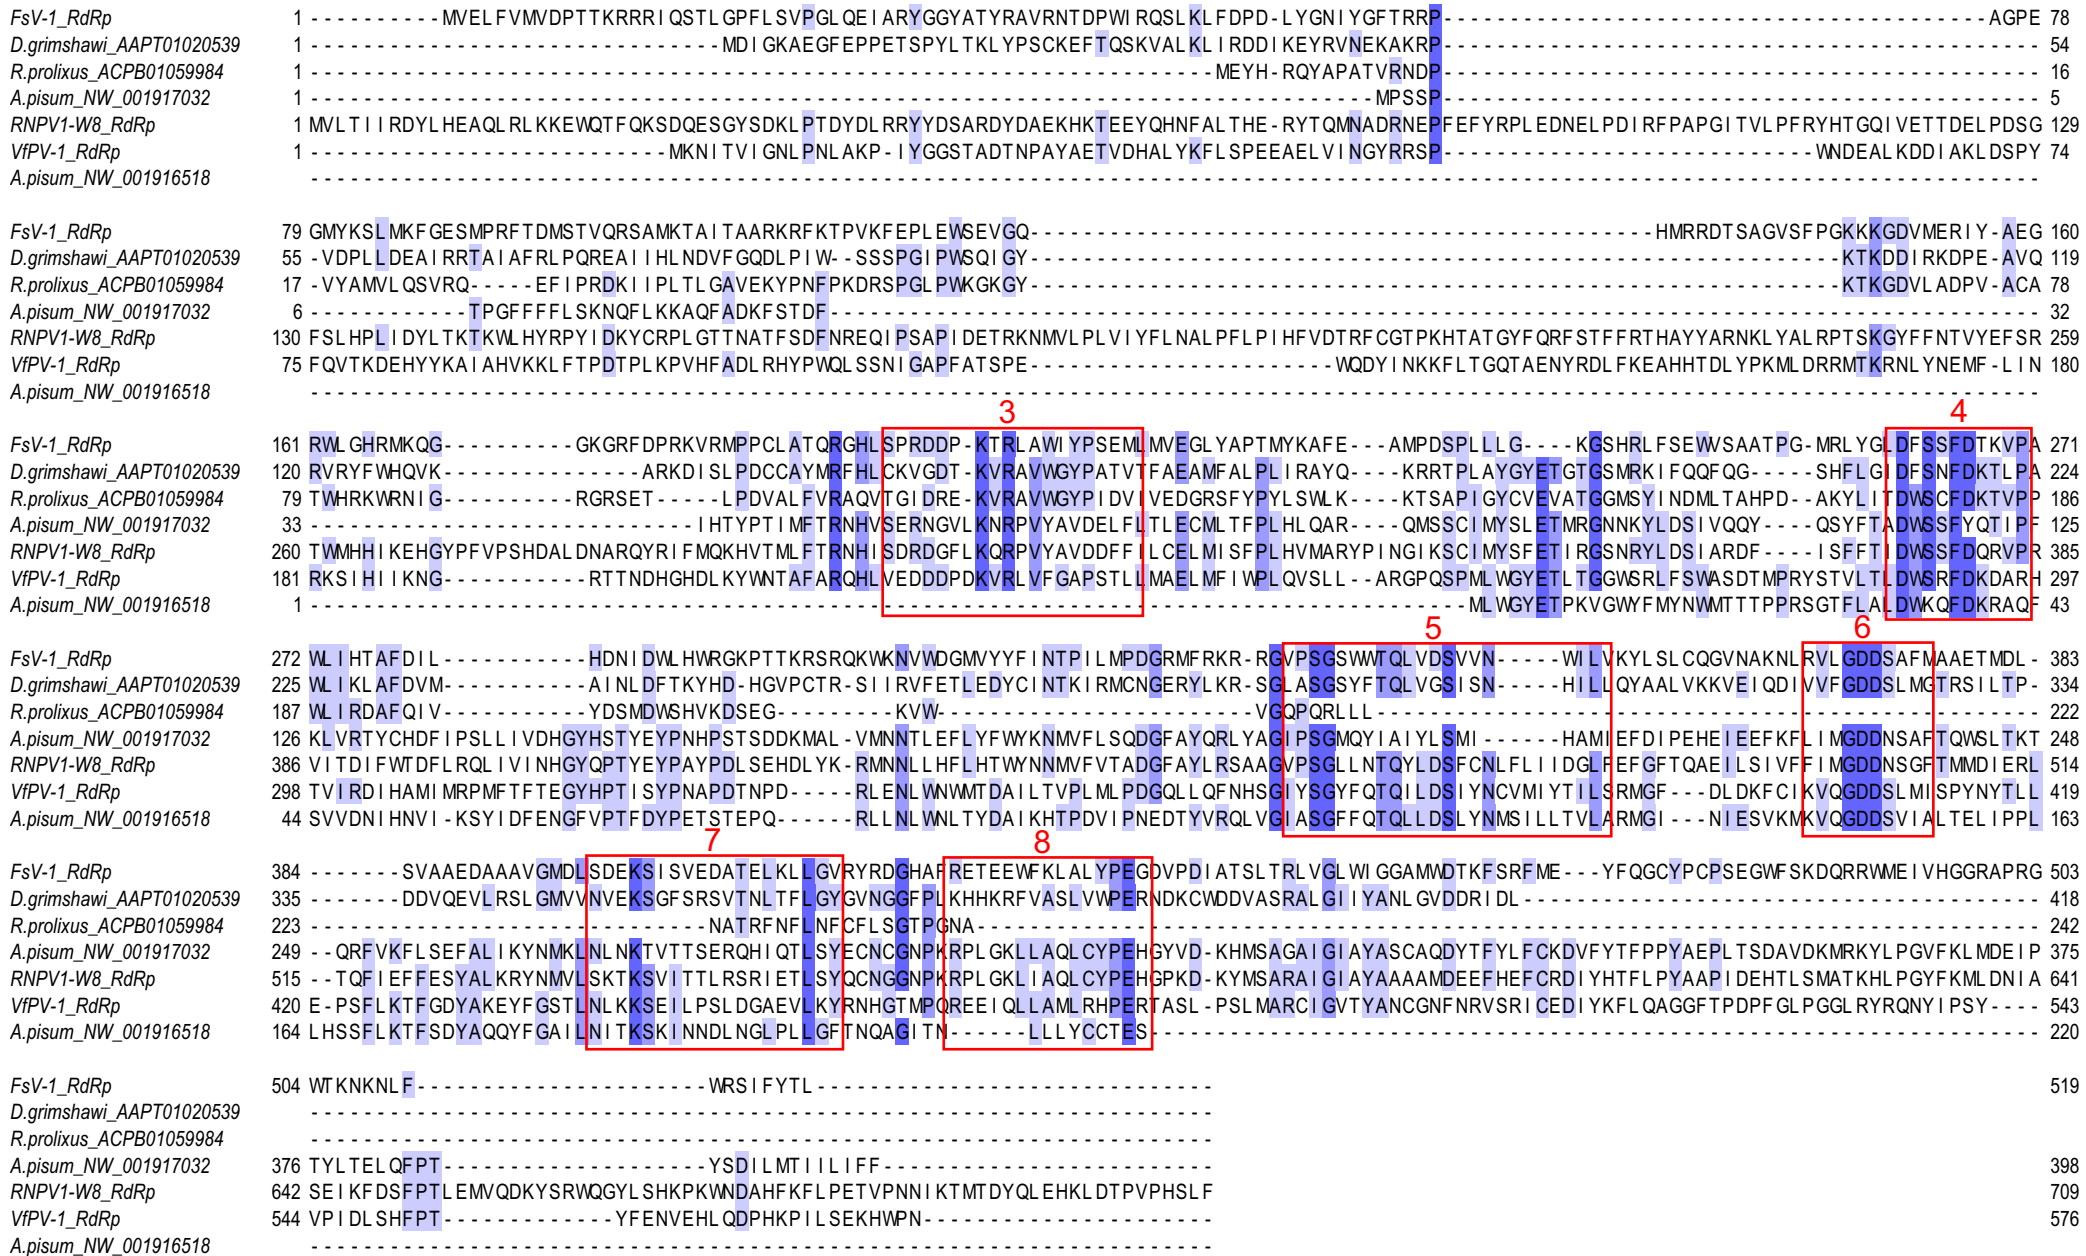



Figure S4

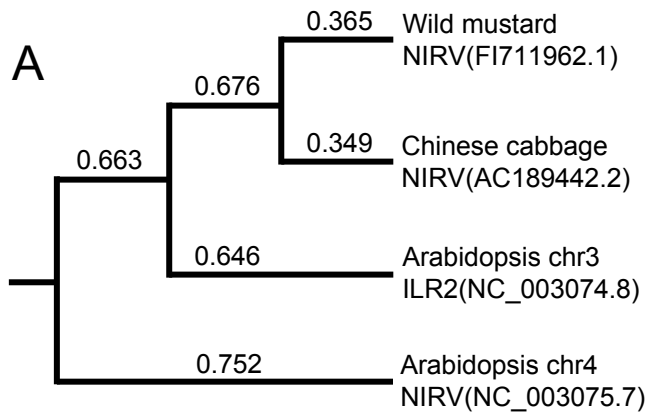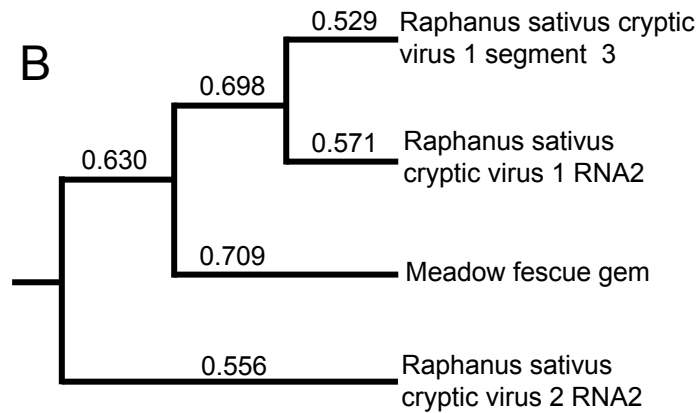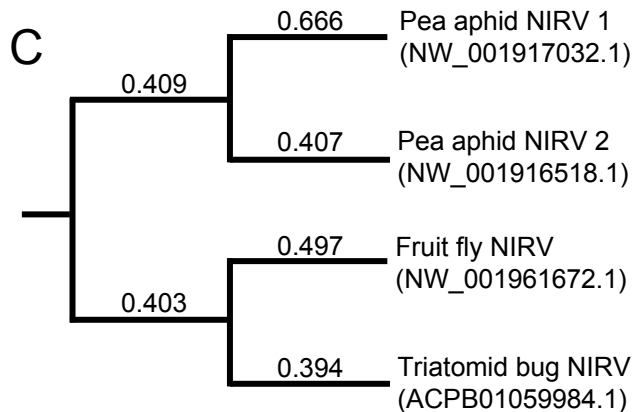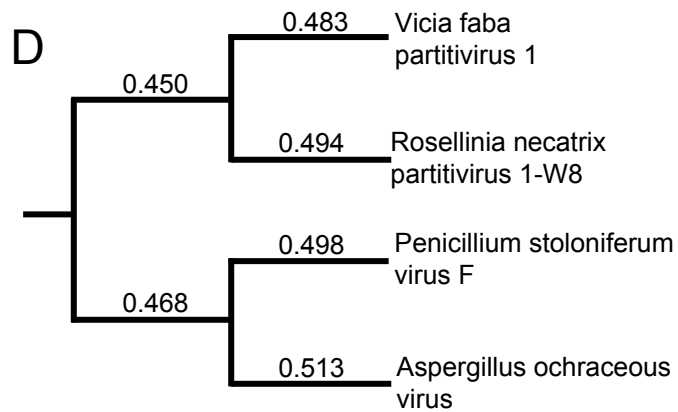

Figure S5

*Arabidopsis thaliana* chr3 NC\_003074.8

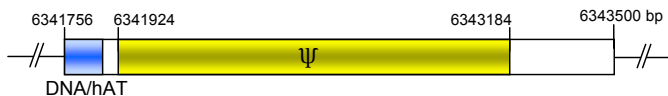

*Arabidopsis thaliana* chr4 NC\_003075.7

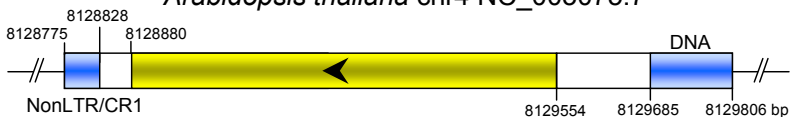

*Brassica rapa subsp. pekinensis* AC189442.2

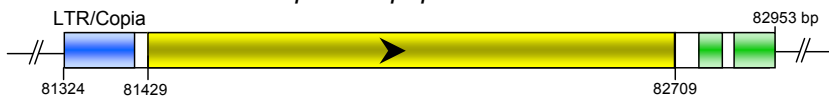

*Medicago truncatula* AC196856.3

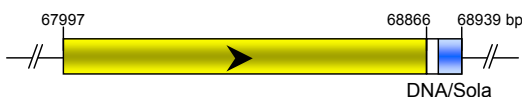

*Lotus japonicus* chr1 AP007812.2

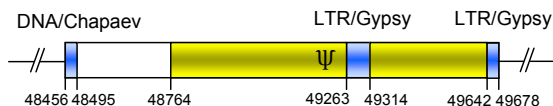

*Entamoeba histolytica* HM-1:IMSS NW\_001915030.1

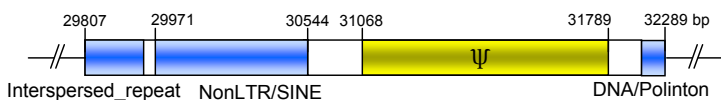

*Acyrtosiphon pisum* strain LSR1 NW\_001916518.1

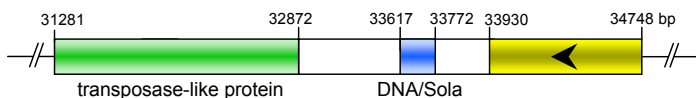

*Acyrtosiphon pisum* strain LSR1 NW\_001917032.1

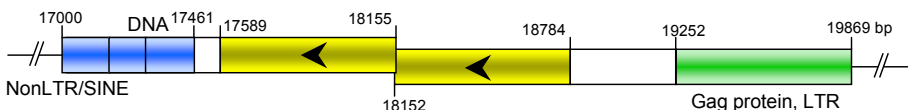

*Drosophila grimshawi* strain TSC #15287-2541.00  
NW\_001961672.1

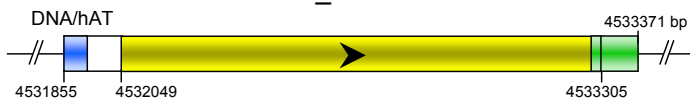

*Ixodes scapularis* strain Wikel

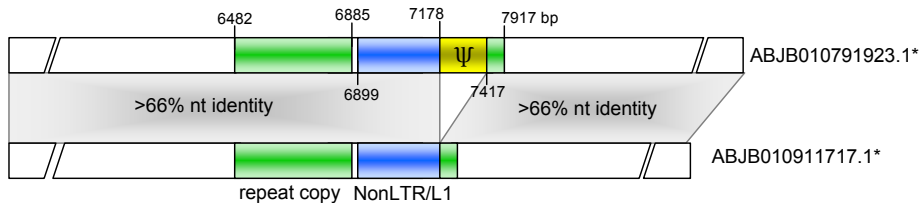

*Populus Trichocarpa* NC\_008473.1

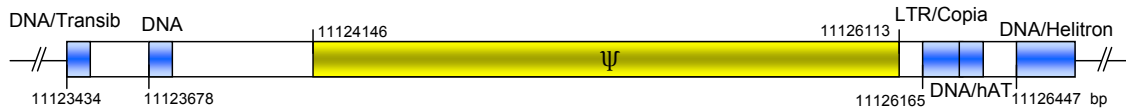

*Aedes aegypti* strain Liverpool AAGE02000678.1

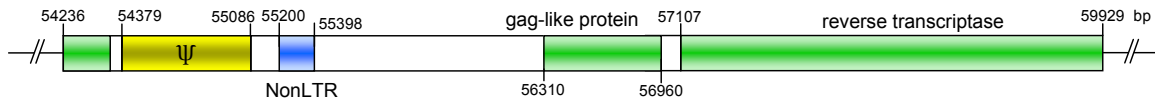

*Debaryomyces hansenii* CBS767 chrB NC\_006044.1

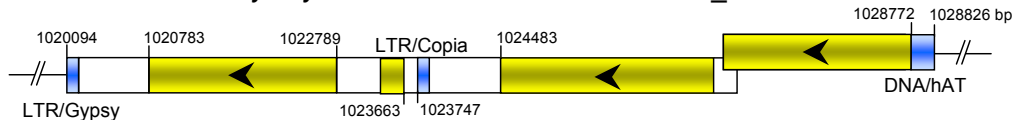

*Pichia stipitis* CBS 6054 chr7 NC\_009047.1

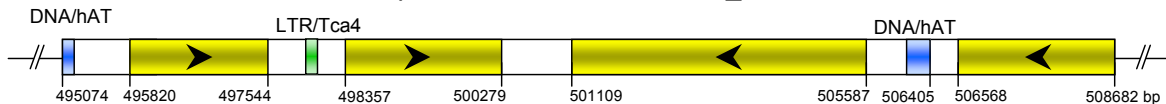

Supplement: supp_84_22_11876__1.pdf [file supp_84_22_11876__1.pdf]
